# Supplementary material
Source: PubMed Central journal article supplement (PMC2668068)
Supplement: mmc1.pdf [file mmc1.pdf]

## Supplemental Data

### Mutations in Glucose Transporter 9 Gene

#### *SLC2A9* Cause Renal Hypouricemia

Hirota Matsuo, Toshinori Chiba, Shushi Nagamori, Akiyoshi Nakayama, Hideharu Domoto, Kanokporn Phetdee, Pattama Wiriyasermkul, Yuichi Kikuchi, Takashi Oda, Junichiro Nishiyama, Takahiro Nakamura, Yuji Morimoto, Keiko Kamakura, Yutaka Sakurai, Shigeaki Nonoyama, Yoshikatsu Kanai, and Nariyoshi Shinomiya

**Table S1. Primer pairs used for sequence and restriction enzyme analysis of human *GLUT9* gene**

| Exon                        | Primer-forward                  | Primer-reverse                   | Amino acid changes        | Restriction enzyme  |
|-----------------------------|---------------------------------|----------------------------------|---------------------------|---------------------|
| Putative promoter isoform 1 | 5'-GAAGGGAAGACTGTTCTTGG-3'      | 5'-CTAGTATCAGAAGCCTGGAG-3'       |                           |                     |
| Putative promoter isoform 2 | 5'-GGGATGGAAGATTTTTGAGC-3'      | 5'-ACTCAGCCAACAGGAAGTGAAGT-3'    |                           |                     |
| Exon 1a (5'UTR)             | 5'-TTCTTTGCTTGGCATTACCC-3'      | 5'-GCCTTGGCATTCAACATTC-3'        |                           |                     |
| Exon 2 (5'UTR + coding)     | 5'-GCAAACCTTTGGAAGACTGC-3'      | 5'-TTAACAGCCTCCCACTGACC-3'       |                           |                     |
| Exon 1b (5'UTR + coding)    | 5'-TCAAATTGCCACACTTCTG-3'       | 5'-GCCTGCCTTCCCACAG-3'           |                           |                     |
| Exon 3                      | 5'-GGACAAAGACTTCTCCTCCG-3'      | 5'-CGCACCCGAAGGTTTCC-3'          |                           |                     |
| Exon 4                      | 5'-TTGTTTTGTACTGGCTTGC-3'       | 5'-GGACCCTGACAATGACACAG-3'       |                           |                     |
| Exon 5                      | 5'-CTGGGATGGACAGTTCAGTG-3'      | 5'-CTCACATTTGGGACACCC-3'         |                           |                     |
| Exon 6                      | 5'-GTCCTCTGAAATGCACCTCC-3'      | 5'-GCACAGAAGATGCCTAAACAAACACA-3' | <b>R198C</b><br>(cgt→tgt) | <b><i>AlwI</i></b>  |
| Exon 7                      | 5'-CAGTCCCCTCAACAATGACC-3'      | 5'-ATTGGCCCAGGTCCCAG-3'          |                           |                     |
| Exon 8                      | 5'-CAGGGCCAGCATTAGAC-3'         | 5'-CACCTCTGATCCCTCCAG-3'         |                           |                     |
| Exon 9                      | 5'-AGAAAATAGATTAAGTCTTCCACTG-3' | 5'-TGAACATTCCCAGTGTGCTG-3'       |                           |                     |
| Exon 10                     | 5'-GGTGACCATATCCATCCAG-3'       | 5'-GAAGGAGCACCTTAAGGTTG-3'       | <b>R380W</b><br>(cgg→tgg) | <b><i>BtsCI</i></b> |
| Exon 11                     | 5'-ACCCATCAACCATCATC-3'         | 5'-CCTTCTGTGGGATAGACTGC-3'       |                           |                     |
| Exon 12                     | 5'-GTGTGGCAGATGGAGATGG-3'       | 5'-AGTGCTGCAGAATCAAAGGG-3'       |                           |                     |
| Exon 13-1 (coding)          | 5'-TTGAGCCAGCATCACACATGG-3'     | 5'-TCCTTGCAGCTTCCAGAAGGG-3'      |                           |                     |
| Exon 13-2 (3'UTR)           | 5'-TGCAGAAATCAGCCAGGCATT-3'     | 5'-GGTTGAGGGCAGGTCAAGGC-3'       |                           |                     |

Primers for the analysis of *GLUT9* exon 10 were designed so that PCR amplification and the following *BtsCI* digestion result in one band (757 bp) from the normal controls, but an additional two bands (408 bp and 349 bp) from the R380W mutant samples. Primers for analysis of *GLUT9* exon 6 were designed based on a similar concept, so that PCR amplification followed by *AlwI* digestion results in two distinct bands (378 bp and 259 bp) from the normal controls, but in one band (637 bp) from the R198C mutant samples.

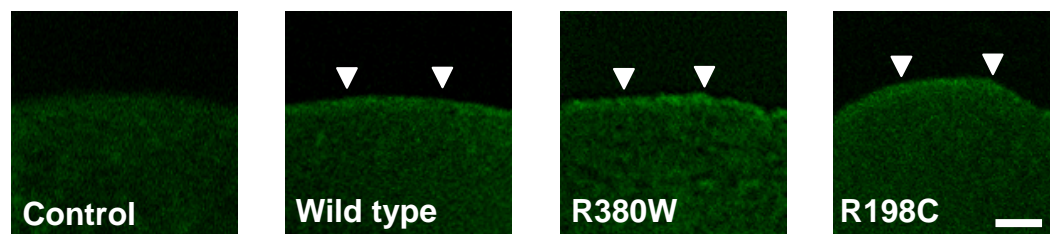

**Figure S1. Subcellular localization of wild-type or mutated GLUT9 in oocytes.**

Immunodetection with anti-GLUT9 shows that GLUT9L proteins (wild type, R380W, and R198C) are expressed on the plasma membrane (arrowheads), whereas fluorescence remains undetectable in water-injected control oocytes. Bar = 50  $\mu$ m.

| Species                       |                           | R380W                                     | R198C                                     |
|-------------------------------|---------------------------|-------------------------------------------|-------------------------------------------|
| Scientific name               | Common name               |                                           |                                           |
| <i>Homo sapiens</i>           | Human                     | F S G L V I E H L G R R P L L I G G F G L | Y L S E I S P K E I R G S L G Q V T A I F |
| <i>Pan troglodytes</i>        | Chimpanzee                | F S G L V I E H L G R R P L L I G G F G L | Y L S E I S P K E I R G S L G Q V T A I F |
| <i>Macaca mulatta</i>         | Rhesus macaque            | F S G L V I E H L G R R P L L I G D F G L | Y L S E I S P K K I R G S L G Q V T A I F |
| <i>Monodelphis domestica</i>  | Gray short-tailed opossum | F S G L V I D R L G R R P L L I G G F G L | Y L S E I S P K E I R G S L G Q I T A I F |
| <i>Mus musculus</i>           | House mouse               | F S G L V I E R L G R R P L L I G G F G L | Y L N E I S P K E I R G S L G Q V T A I F |
| <i>Echinops telfairi</i>      | Lesser hedgehog tenrec    | F S G L V I E H L G R R P L L I G G F G L | Y L S E I S P K E I R G S L G Q V T A I F |
| <i>Canis familiaris</i>       | Domestic dog              | F S G L V I E R L G R R P L L I G G F G L | Y L N E I S P K E I R G A L G Q V T A I F |
| <i>Ochotona princeps</i>      | American pika             | F S G L A I E R L G R R P L L I G G F G L | Y L N E I S P K E L R G S L G Q V M A I F |
| <i>Gallus gallus</i>          | Red junglefowl            | S S G L V I E R L G R R P L L I G G F G L | Y L S E I S P K E I R G S L G Q V T A I F |
| <i>Takifugu rubripes</i>      | Tiger puffer (Torafugu)   | I S G L V I E R I G R K P L L I F G F T A | Y L G E I T P R H I R G S I G Q F N S I L |
| <i>Gasterosteus aculeatus</i> | Threespine stickleback    | I S G L V I E R I G R K P L L I F G F S A | Y L G E I T P R H I R G S I G Q F N S I L |
| <i>Oryzias latipes</i>        | Japanese medaka           | I S G L V I E R I G R K P L L I F G F S S | Y L G E I S P R H I R G F I G Q F N S I L |

**Figure S2. Amino acid conservation in GLUT9 vertebrate orthologs.**

Arginine residues orthologous to human GLUT9 amino acid positions 380 and 198, which are the sites of missense mutations identified in hypouricemia patients, are boxed in magenta.

| Species                         | Transporter (amino acid)          | Sugar transport proteins signature 1      | Transporter (amino acid)          | Sugar transport proteins signatures 2                 | Snonym                                                                        |
|---------------------------------|-----------------------------------|-------------------------------------------|-----------------------------------|-------------------------------------------------------|-------------------------------------------------------------------------------|
| <i>Homo sapiens</i>             | GLUT9 (371-387)                   | SGLVIEHLGRRPLLIIG-G                       | GLUT9 (173-198)                   | IMGIDGGVALSVLPMYLSEISPKIEIR                           | Glucose transporter 9 (SLC2A9)                                                |
|                                 | GLUT1 (324-340)<br>HMIT (362-378) | SLFVVERAGRRTLHLI-G<br>GVWLVEKVGRRKLTFFG-S | GLUT1 (128-153)<br>HMIT (161-186) | IIGVYCGLTTFVPMYVGEVSPALR<br>VVGLGIGIASMTVPVYIAEVSPNLR | Glucose transporter 1 (SLC2A1)<br>Proton myo-inositol cotransporter (SLC2A13) |
| <i>Saccharomyces cerevisiae</i> | Hxt1 (377-394)                    | SLYTVDRFGRRNCLMWGA                        | Hxt1 (176-201)                    | ISGLGVGGITVLSPLMISEVAPSEMR                            | Low-affinity glucose transporter HXT1                                         |
|                                 | Hxt2 (368-385)                    | ALYTVDKFGRRKCLLGGG                        | Hxt2 (167-192)                    | ISGMGVGGIAVLSPTLISETAPKHIR                            | High-affinity glucose transporter HXT2                                        |
|                                 | Hxt3 (374-391)                    | SLYTVDRFGRRNCLLYGA                        | Hxt4 (182-207)                    | ISGLGVGGIAVLSPLMISEVSPKHIR                            | Low-affinity glucose transporter HXT3                                         |
|                                 | Hxt4 (383-400)                    | GIFLVERYGRRRCLLWGA                        | Hxt3 (173-198)                    | ISGLGVGGIAVLSPLMISEVAPKEMR                            | Low-affinity glucose transporter HXT4                                         |
|                                 | Hxt5 (398-414)                    | SLYTVDRFGRRNCLLW-G                        | Hxt5 (197-222)                    | ISGLGVGGITVLAPMLISEVSPKQLR                            | Probable glucose transporter HXT5                                             |
|                                 | Hxt6 (377-394)                    | GIYVVVERYGRRTCLLWGA                       | Hxt6 (176-201)                    | ISGLGVGGIAVLSPLMISEVSPKHLR                            | High-affinity hexose transporter HXT6                                         |
|                                 | Hxt7 (377-394)                    | GIYVVVERYGRRTCLLWGA                       | Hxt7 (176-201)                    | ISGLGVGGIAVLSPLMISEVSPKHLR                            | High-affinity hexose transporter HXT6                                         |
|                                 | Hxt8 (379-396)                    | SLYSVDKLGRRRCLLLGA                        | Hxt8 (178-203)                    | IAGIGAGSISVLAPMLISETAPKHIR                            | Hexose transporter HXT8                                                       |
|                                 | Hxt9 (373-390)                    | AVYTIERFGRRTCLLWGA                        | Hxt9 (172-197)                    | ISGLGVGGIAVLSPLMISEVAPKQIR                            | Hexose transporter HXT9                                                       |
|                                 | Hxt10 (361-378)                   | ALYIVDKFGRRKCLLWGS                        | Hxt10 (160-185)                   | VSGMGVGGVAVLSPTLISEISPKHLR                            | Hexose transporter HXT10                                                      |
|                                 | Hxt11 (373-390)                   | AVYTIERFGRRTCLLWGA                        | Hxt11 (172-197)                   | ISGLGVGGIAVLSPLMISEVAPKHIR                            | Hexose transporter HXT11                                                      |
|                                 | Hxt13 (370-387)                   | AVMVVDKI GRRKCLLFGA                       | Hxt13 (169-194)                   | IYGLGAGGCSVLCPMLLSEIAPTDLR                            | Hexose transporter HXT13                                                      |
|                                 | Hxt15 (373-390)                   | AVMVVDKI GRRKCLLFGA                       | Hxt15 (172-197)                   | IYGLGAGGCSVLCPMLLSEIAPTDLR                            | Hexose transporter HXT15                                                      |
|                                 | Hxt16 (373-390)                   | AVMVVDKI GRRKCLLFGA                       | Hxt16 (172-197)                   | IYGLGAGGCSVLCPMLLSEIAPTDLR                            | Hexose transporter HXT16                                                      |
|                                 | Hxt17 (370-387)                   | AVMVVDKI GRRKCLLFGA                       | Hxt17 (169-194)                   | IYGLGAGGCSVLCPMLLSEIAPTDLR                            | Hexose transporter HXT17                                                      |
|                                 | Itr1 (390-406)                    | AFFSIDKI GRRTILLI-G                       | Itr1 (188-213)                    | IMGFGVIGISLAPLFISEIAPKMIR                             | Myo-inositol transporter 1                                                    |
|                                 | Pho84 (409-425)                   | SVFTVDIIGRKPIQLA-G                        | Pho84 (170-195)                   | VMGIGIGGDYPLSSIITSEFATTKWR                            | Inorganic phosphate transporter PHO84                                         |
| Ybr241C (349-366)               | ASAIIDHV GRRPLLLAST               | Ybr241C (147-172)                         | LVGMSCGTAIVITPLFINEIAPVEWR        | Probable metabolite transport protein YBR241C         |                                                                               |
| <i>Escherichia coli</i>         | araE (314-330)                    | AVFTVDKA GRKPALKI-G                       | araE (121-146)                    | VLGIAVGIASYTAPPLYLSEMASENVR                           | Arabinose-proton symporter                                                    |
|                                 | galP (307-323)                    | AIGLVDRW GRKPTLTL-G                       | galP (114-139)                    | LLGLAVGVASYTAPPLYLSEIAPEKIR                           | Galactose-proton symporter                                                    |
|                                 | kgtP (299-316)                    | IGALSDKI GRRTSMLCFG                       | kgtP (133-158)                    | FQGLSVGGEYGT SATYMS EVAVEGRK                          | Alpha-ketoglutarate permease                                                  |
|                                 | xylE (332-349)                    | AIMTVDKF GRKPLQIIGA                       | xylE (135-160)                    | IGGIGVGLASMLSPMYIAELAPAHIR                            | D-xylose-proton symporter                                                     |
| <i>Arabidopsis thaliana</i>     | STP1 (338-355)                    | SIYGVDRW GRRFLFLEGG                       | STP1 (142-167)                    | LLGFGIGFANQAVPLYLSEMAPYKYR                            | Sugar transport protein 1                                                     |
|                                 | INT2 (331-347)                    | SIYFIDRI GRKKLLII-S                       | INT2 (133-158)                    | LVGLGVGVASVTAPVYIAEASPSEVR                            | Probable inositol transporter 2                                               |
|                                 | SUGTL3 (312-329)                  | VMLTVDRW GRRPLLMISS                       | SUGTL3 (124-149)                  | FLGFGVGLISYVVPVYIAEITPKTFR                            | Sugar transporter ERD6-like 2                                                 |
|                                 | PLST3 (346-362)                   | AVVLMDKL GRKVLLIIG-S                      | PLST3 (155-180)                   | LVGIGMIGIPSVTALYVTEVSPAYVR                            | Probable plastidic glucose transporter 3                                      |

Pathogenic mutation sites for GLUT9 and GLUT1

**Figure S3. Conserved arginine residues in sugar transport proteins signatures 1/2.**

Pathogenic mutation sites (magenta) of GLUT9 (R380 and R198) and GLUT1 (R333 and R153) in consensus patterns 1/2 (blue) are highly conserved among the sugar transport proteins of yeast, bacteria, plants, and mammals. In the sugar transport proteins signatures 1 or 2, each residue (magenta) of the pathogenic mutation sites is found to be the most highly conserved arginine residue, which may be the determinant of membrane topology. Alignment data are retrieved from PROSITE (also see **Web Resources** and **Accession Numbers** in the main text), which shows perfect amino acid conservation in 374 or 350 sequences of transporters for sugar transport proteins signatures 1 and 2. Representative data of transport proteins from *Saccharomyces cerevisiae*, *Escherichia coli*, *Arabidopsis thaliana*, and *Homo sapiens* are shown in this figure.

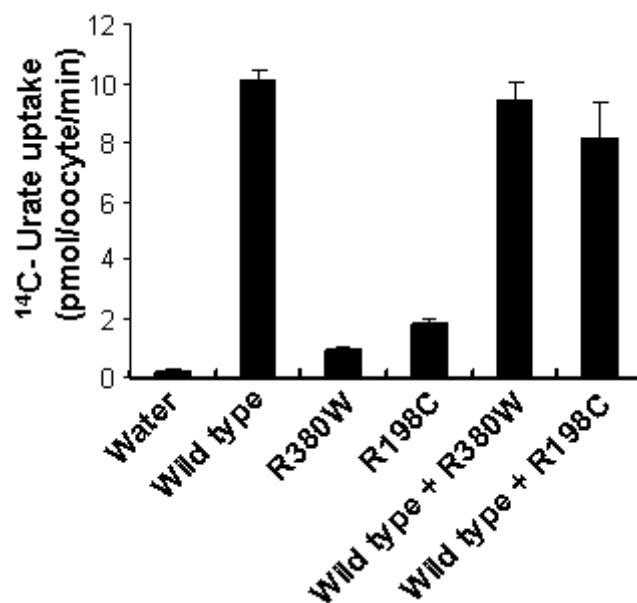

**Figure S4. The effects of co-expression of wild-type and mutant GLUT9 on urate transport activities.** Oocytes were injected with 12.5 ng of wild-type GLUT9L cRNA or mutant cRNA (R380W, R198C). For co-expression studies, both wild-type GLUT9L cRNA (12.5 ng) and mutant cRNA (12.5 ng) were co-injected to test the possibilities of dominant negative effects. Urate transport activities in oocytes injected with mutant cRNA (R380W, R198C) were markedly reduced, but those in co-injected oocytes (wild type + R380W, wild type + R198C) were not reduced. Results are expressed as mean  $\pm$  SEM.

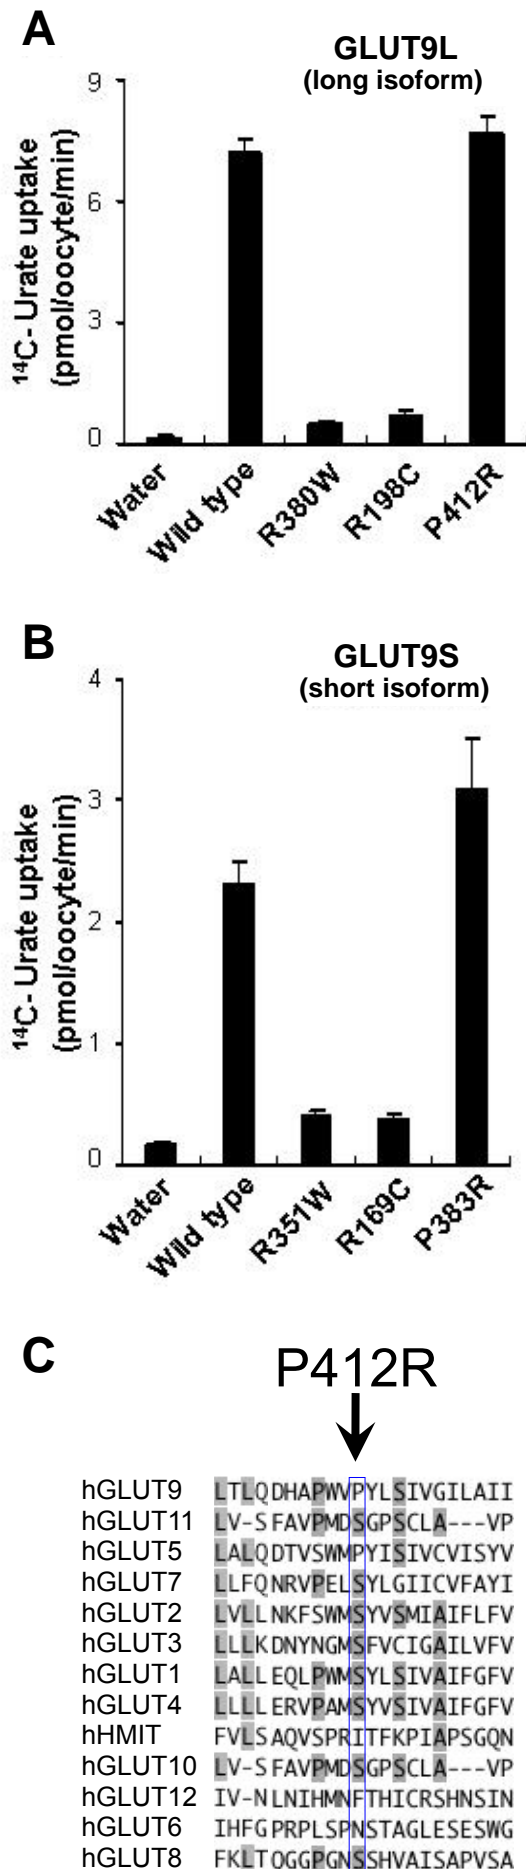

**Figure S5. The P412R mutation is unlikely to be a pathogenic mutation for renal hypouricemia.**

(A,B) The results of oocyte expression studies are displayed. Neither the P412R mutation in GLUT9L nor the P383R mutation in GLUT9S, which correspond to P412R in GLUT9L, reduced their urate transport activities at all. In contrast, pathogenic mutants of GLUT9L (R380W and R198C) and GLUT9S (R351W and R169C) markedly reduced their urate transport (4.6-10.8%). The extent of the reduction in urate transport from GLUT9 pathogenic mutations in our functional analyses are quite similar to those from URAT1 pathogenic mutations for renal hypouricemia. Also, the results from the GLUT9L mutants (A) are quite similar to those from the GLUT9S mutants (B), suggesting the reproducibility and reliability of the results. The reproducibility of the results was confirmed by three independent experiments using different batches of oocytes and *in vitro* transcribed cRNA. These data prove that P412R in GLUT9L and P383R in GLUT9S do not reduce the urate transport activities. Even if the P412R GLUT9 mutant showed moderate reduction in the urate transport activity as recently reported (about 60%) (Anzai, *et al.*, J. Biol. Chem. 2008), the extent of functional reduction is not sufficient to cause clinical hypouricemia. These findings suggest that P412R is unlikely to be a pathogenic mutation for renal hypouricemia. Results are expressed as mean  $\pm$  SEM. (C) The site of P412R is not conserved in the GLUT family transporters. In contrast, the pathogenic mutation sites R380W and R198C, which we identified in this study, are highly conserved in GLUT family transporters.

The extent of the reduction in urate transport (%) is calculated as follows; [(Uptake by mutant GLUT9-expressed oocytes) – (Uptake by control oocytes)] / [(Uptake by wild-type GLUT9-expressed oocytes) – (Uptake by control oocytes)]  $\times$  100.
